# Supplementary material for: Soluble ST2 concentrations associate with in-hospital mortality and need for mechanical ventilation in unselected patients with COVID-19
Source: HighWire-hosted journal article supplement (doi:10.1136/openhrt-2021-001884), 2021-12-01
Supplement: openhrt-2021-001884supp001_data_supplement.pdf [file openhrt-2021-001884supp001_data_supplement.pdf]

## **Supplementary Material**

**to**

### **ST2 concentrations Associate with In-Hospital Mortality and Need for Mechanical Ventilation in Unselected Patients Hospitalized with COVID-19**

**Supplementary Table 1.** Multivariable logistic regression analysis of clinical characteristics and biomarkers in association with intensive care unit admission or death. All variables in the table were included as independent variables.

|                                                                   | OR   | 95% C.I. |       | P-value |
|-------------------------------------------------------------------|------|----------|-------|---------|
| Age, years                                                        | 1.07 | 1.00     | 1.14  | 0.042   |
| Male sex                                                          | 2.24 | 0.64     | 7.87  | 0.207   |
| White race                                                        | 0.53 | 0.17     | 1.70  | 0.288   |
| Body mass index, kg/m <sup>2</sup>                                | 1.10 | 0.98     | 1.22  | 0.093   |
| Cardiovascular disease                                            | 1.96 | 0.37     | 10.25 | 0.427   |
| Estimated glomerular filtration rate (ml/min/1.73m <sup>2</sup> ) | 1.00 | 0.97     | 1.03  | 0.980   |
| log Interleukin-6 (pg/mL)                                         | 0.92 | 0.52     | 1.62  | 0.87    |
| log C-reactive protein (mg/L)                                     | 1.39 | 0.67     | 2.87  | 0.56    |
| log Procalcitonin (µg/L)                                          | 0.96 | 0.44     | 2.08  | 0.51    |
| log Ferritin (µg/L)                                               | 2.23 | 1.12     | 4.44  | 0.10    |
| log D-dimer (mg/L)                                                | 1.02 | 0.54     | 1.93  | 0.78    |
| log Cardiac troponin T (ng/L)                                     | 0.46 | 0.16     | 1.30  | 0.10    |
| log N-terminal pro-B-type natriuretic peptide (ng/L)              | 0.88 | 0.50     | 1.56  | 0.68    |
| log ST2 (ng/mL)                                                   | 6.11 | 1.45     | 25.73 | 0.014   |
